# Supplementary material
Source: PubMed Central journal article supplement (PMC6615475)

H&E

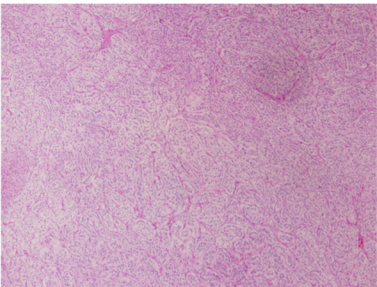

ER

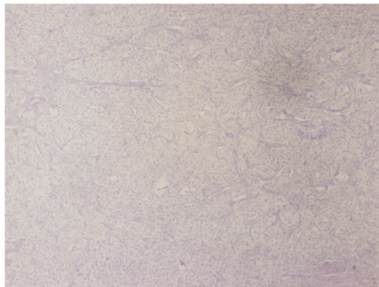

LH

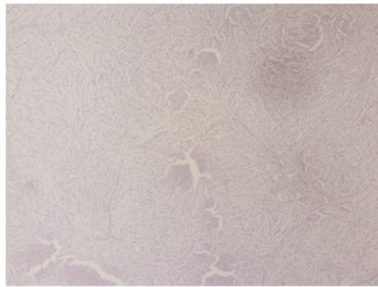

Synaptophysin

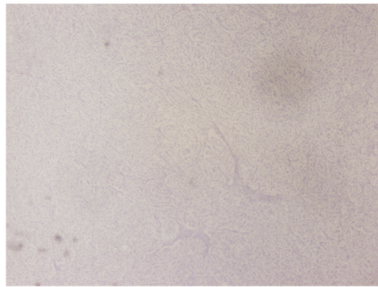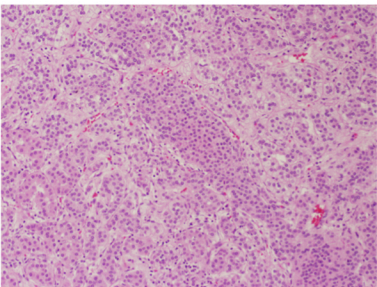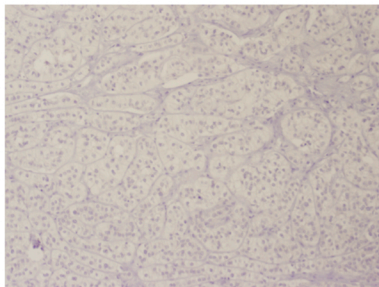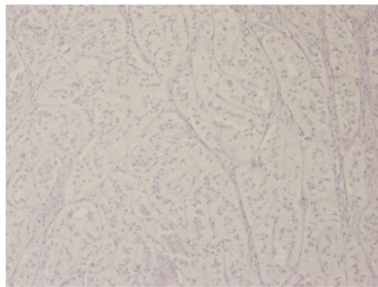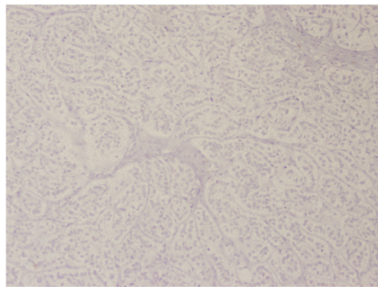

Supplementary Figure 1.

Supplement: NIHMS1529470-supplement-1.pdf [file NIHMS1529470-supplement-1.pdf]

Inhibin A

Case:  
*ARMC5 p.R173\**

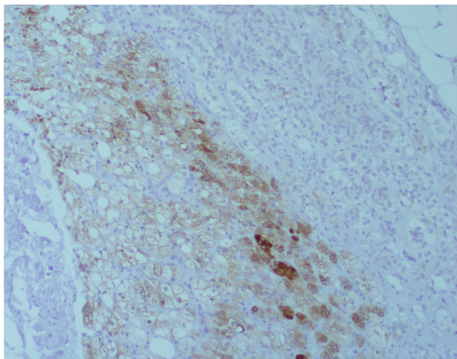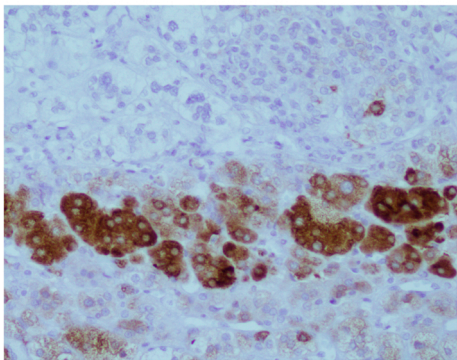

Supplementary Figure 2.

Supplement: NIHMS1529470-supplement-2.pdf [file NIHMS1529470-supplement-2.pdf]
